# Supplementary material
Source: Springer Nature journal article supplement (https://www.springermedizin.de/resource/supplementary/12888_2012_1327_MOESM2_ESM.pdf/9479892)

Cumulative Percentage of Patients Remaining in the Study (%)

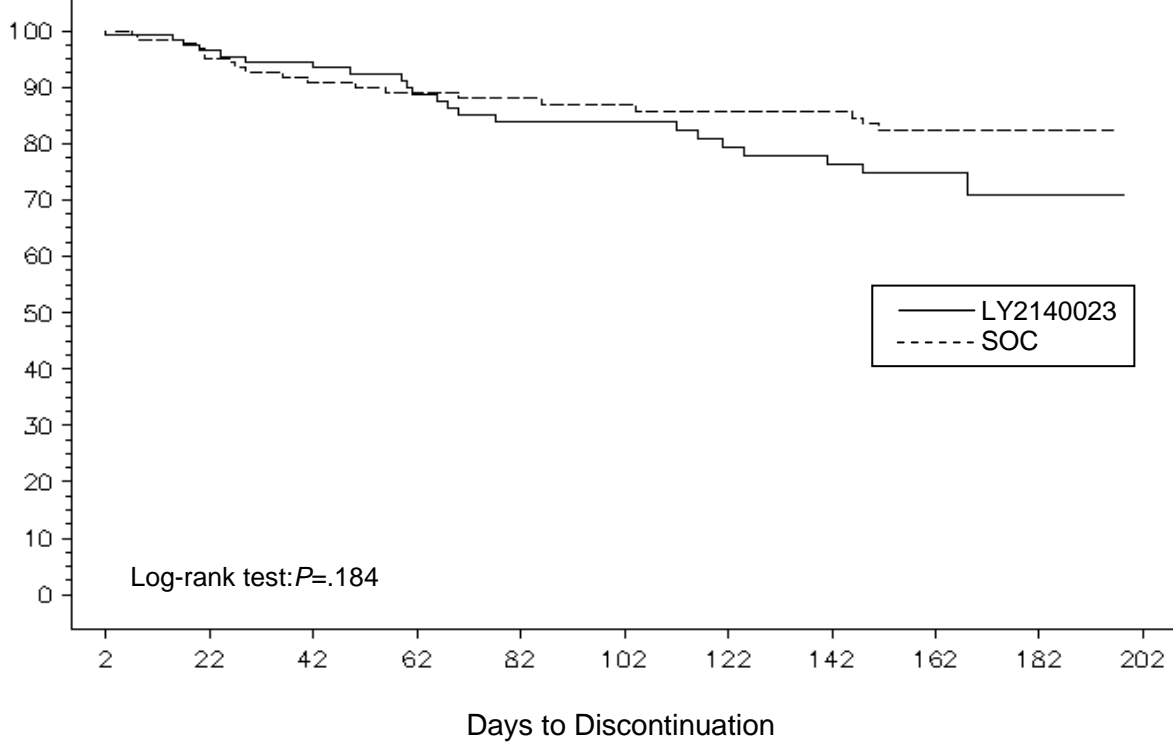

Supplement: MOESM2 [file 9479892]
